# Supplementary material
Source: publisher figshare collection journal article supplement (https://diabetesjournals.figshare.com/ndownloader/files/30636981)
Supplement: Supplementary file 1 [file 30636981]

**Supplemental Table S1. Subject Acceptance Survey Results – All Subjects using OT Verio Flex meter and OT Reveal mobile app**

|  | Test (n=74)1 + Control (n=30)2 | | | |
| --- | --- | --- | --- | --- |
| **Statement3** | % Unfav.4 | % Neutral | % Favor.5 | Sig.6 |
| **Meter only** | | | | |
| The Flex meter makes managing diabetes easier (compared to my previous meter). | 1 | 16 | 83 | yes |
| ColorSure technology makes it clear when you are in or out of range | 0 | 10 | 90 | yes |
| ColorSure technology helps make it clear when to take action on a low or high. | 0 | 16 | 84 | yes |
| ColorSure technology helped me better manage my blood sugar (compared to my previous meter). | 0 | 20 | 80 | yes |
| ColorSure technology helped me better manage highs and lows (compared to my previous meter). | 0 | 25 | 75 | yes |
| ColorSure technology prompted me to take action more often (compared to my previous meter). | 5 | 13 | 82 | yes |
| ColorSure technology helped me to take action so I could get back in range. | 3 | 14 | 83 | yes |
| ColorSure technology made it easier to understand my results, so I tested more often (compared to their previous meter) | 0 | 16 | 84 | yes |
| ColorSure technology helped me see how food impacts my blood glucose. | 0 | 25 | 75 | yes |
| I prefer this meter (compared to my previous meter) | 2 | 13 | 85 | yes |
| **Meter and mobile app** | | | | |
| The meter and mobile app helped me better understand my results (compared to my previous meter). | 0 | 7 | 93 | yes |
| Managing diabetes was easier with the mobile app (compared to without an app). | 0 | 19 | 81 | yes |
| It was less work managing my diabetes with the mobile app (compared to without an app). | 1 | 23 | 76 | yes |
| It took less time to manage my diabetes with the mobile app (compared to without an app). | 2 | 21 | 77 | yes |
| The mobile app made it easy to track my daily activities and blood sugar results. | 0 | 23 | 77 | yes |
| The mobile app made it quicker to manage my blood sugar. | 2 | 19 | 79 | yes |
| ColorSure technology on the meter and mobile app helped me make the correct treatment decisions. | 4 | 16 | 80 | yes |
| The meter and mobile app helped me be successful managing my blood sugar. | 2 | 22 | 76 | yes |
| **Pattern features on the mobile app** | | | | |
| The patterns helped me see the link between my actions and blood sugar. | 6 | 37 | 58 | no |
| Insights from the patterns helped me take action to get back in range. | 7 | 40 | 53 | no |
| The patterns could help me to avoid future highs and lows. | 8 | 41 | 51 | no |
| Taking action on the patterns helped me stay in range more often. | 7 | 44 | 49 | no |
| The patterns make it easier and quicker to see when I go out of range | 9 | 41 | 50 | no |
| The patterns make it quicker and easier to see why I go out of range | 12 | 38 | 51 | no |
| The patterns helped me see how food impacts my blood sugar. | 12 | 39 | 48 | no |
| I was able to correct the underlying cause of the patterns to get my blood sugar back into range. | 13 | 39 | 48 | no |
| **Testing reminder on your cell phone** | | | | |
| The testing reminder helped me test as recommended by my doctor. | 2 | 6 | 92 | yes |
| The testing reminder helped me stay on track with my treatment plan | 2 | 7 | 91 | yes |
| The testing reminder helped me to test more often | 2 | 6 | 92 | yes |

1Test subjects answered survey after using OneTouch (OT) Verio Flex meter and OT Reveal mobile app for 12 weeks (baseline to week 12).

2Control subjects answered survey after switching to OT Verio Flex meter and OT Reveal mobile app for 12 weeks (week 12 to week 24).

3Subjects responded to each statement with strongly agree, agree, neither agree nor disagree (neutral response), disagree, or strongly disagree. All statements were translated into Spanish.

4Unfav., Unfavorable response = disagree + strongly disagree, 5Favor., Favorable response = agree + strongly agree

6Sig., significant = lower one-sided 95% confidence limit for the % of favorable responses >50%.

**Supplemental Table S2. DTSQ Change Scores**

|  | Week 12 | | | Week 24 | | | |
| --- | --- | --- | --- | --- | --- | --- | --- |
| Question1 | Test2 | Control3 | p-value4 | Test | p-value5 | Crossed-over Control6 | p-value5 |
|  | *N=74* | *N=35* |  | *N=69* |  | *N=30* |  |
| 1 | 1.4 | 0.7 | 0.001 | 2.2 | <0.005 | 2.2 | <0.005 |
| 2 | -0.4 | -0.4 | ns | -0.5 | ns | -0.3 | ns |
| 3 | -0.2 | 0 | ns | -0.1 | ns | 0 | ns |
| 4 | 1.2 | 0.8 | ns | 1.9 | <0.005 | 1.9 | <0.005 |
| 5 | 1.2 | 0.7 | 0.01 | 2.0 | <0.005 | 2.3 | <0.005 |
| 6 | 1.5 | 1.0 | 0.02 | 2.2 | <0.005 | 2.5 | <0.005 |
| 7 | 1.8 | 0.9 | 0.001 | 2.4 | <0.005 | 2.6 | <0.005 |
| 8 | 1.9 | 1.0 | 0.001 | 2.4 | <0.005 | 2.5 | <0.005 |

Values shown are mean scores, however, analysis was based on rankings using the Mann-Whitney U-test.

1Subjects circled -3, -2, -1, 0, 1, 2, or 3 for each question. 1, 2 or 3 were positive change responses for questions #1, #4-8. -1, -2, or -3 were positive change responses for questions #2-3 (see Supplemental Figure S3). All questions were translated into Spanish.

2Test subjects used OT Verio Flex meter and OT Reveal mobile app from baseline to week 24.

3Control subjects used their own meters and no diabetes mobile app from baseline to week 12.

4Comparison of test vs. control at week 12 using the Mann-Whitney U Test.

5Comparison within groups at week 24 vs. week 12 using the Mann-Whitney U Test

6Subjects were crossed-over to OT Verio Flex + OT Reveal mobile app for week 12 to 24.

**Supplemental Table S3. HCP advice via text messaging**

|  | Number of Subjects receiving messages | | |
| --- | --- | --- | --- |
|  | Test Subjects1 | Crossed-over Control subjects2 | All Subjects |
|  | *N=76* | *N=37* | *N=113* |
| Diet, food, lifestyle, exercise | 33 (43.4%)3 | 11 (29.7%) | 44 (38.9%) |
| SMBG Regimen | 21 (27.6%) | 11 (29.7%) | 32 (28.3%) |
| Insulin adjustment | 14 (18.4%) | 5 (13.5%) | 19 (16.8%) |
| Oral med/GLP-1 adjustment | 10 (13.2%) | 1 (2.7%) | 11 (9.7%) |
| Diabetes on track | 74 (97.4%) | 37 (100%) | 111 (98.2%) |

1Test subjects used OneTouch (OT) Verio Flex meter and OT Reveal mobile app for 24 weeks and received 780 text messages from their healthcare professionals (HCPs).

2Control subjects used their own meter and no mobile app for first 12 weeks (no text messaging) and OT Verio Flex meter and OT Reveal mobile app for next 12 weeks and received 175 text messages.

3Data shown are number (percentage) of subjects receiving a text message in the category at least once divided by the total number of subjects. Percentages add up to >100% because subjects could receive more than one category of message during the study.

**Supplementary Figure S1. Subjective Numeracy Evaluation Questionnaire**

*Note: A Spanish-language translation of this form was given to all subjects*

*To be completed by all subjects at Baseline (Visit 1)*

**Please read each instruction and question carefully before circling your response.**

| For each question, please check the box that best reflects **how good you are at doing the following things:** | | | | | | |
| --- | --- | --- | --- | --- | --- | --- |
| **Circle ONE response to each statement**. | **Not at all good** |  |  |  |  | **Extremely good** |
| Example | **1** | **2** | **3** | 4 | **5** | **6** |
| 1. How good are you at working with fractions? | **1** | **2** | **3** | 4 | **5** | **6** |
| 1. How good are you at working with percentages? | **1** | **2** | **3** | 4 | **5** | **6** |
| 1. How good are you at calculating a 15% tip? | **1** | **2** | **3** | 4 | **5** | **6** |
| 1. How good are you at figuring out how much a shirt will cost if it is 25% off? | **1** | **2** | **3** | 4 | **5** | **6** |
| For each of the following questions, please circle the number that **best reflects your answer:**  **Circle ONE response to each statement**. | | | | | | |
| 1. When reading the newspaper, how **helpful** do you find tables and graphs that are parts of a story? | **1**  **Not at all helpful** | **2** | **3** | 4 | **5** | **6 Extremely helpful** |
| 1. When people tell you the chance of something happening, do you prefer that they use **words** (“it rarely happens”) or **numbers** (“there’s a 1% chance”)? | **1**  **Always prefer words** | **2** | **3** | 4 | **5** | **6**  **Always prefer numbers** |
| 1. When you hear weather forecast, do you prefer predictions using **percentages** (e.g. “there will be a 20% chance of rain today”) or predictions using only **words** (e.g. “there is a small chance of rain today”)? | **1**  **Always prefer words** | **2** | **3** | 4 | **5** | **6**  **Always prefer %** |
| 1. How **often** do you find numerical information to be useful? | **1**  **Never** | **2** | **3** | 4 | **5** | **6**  **Very often** |
|  | | | | | | | |

***Thank you!***

**Supplemental Figure S2. DTSQ (status) given to all subjects at baseline.**

*Note: A Spanish-language translation of this form was presented to all subjects*


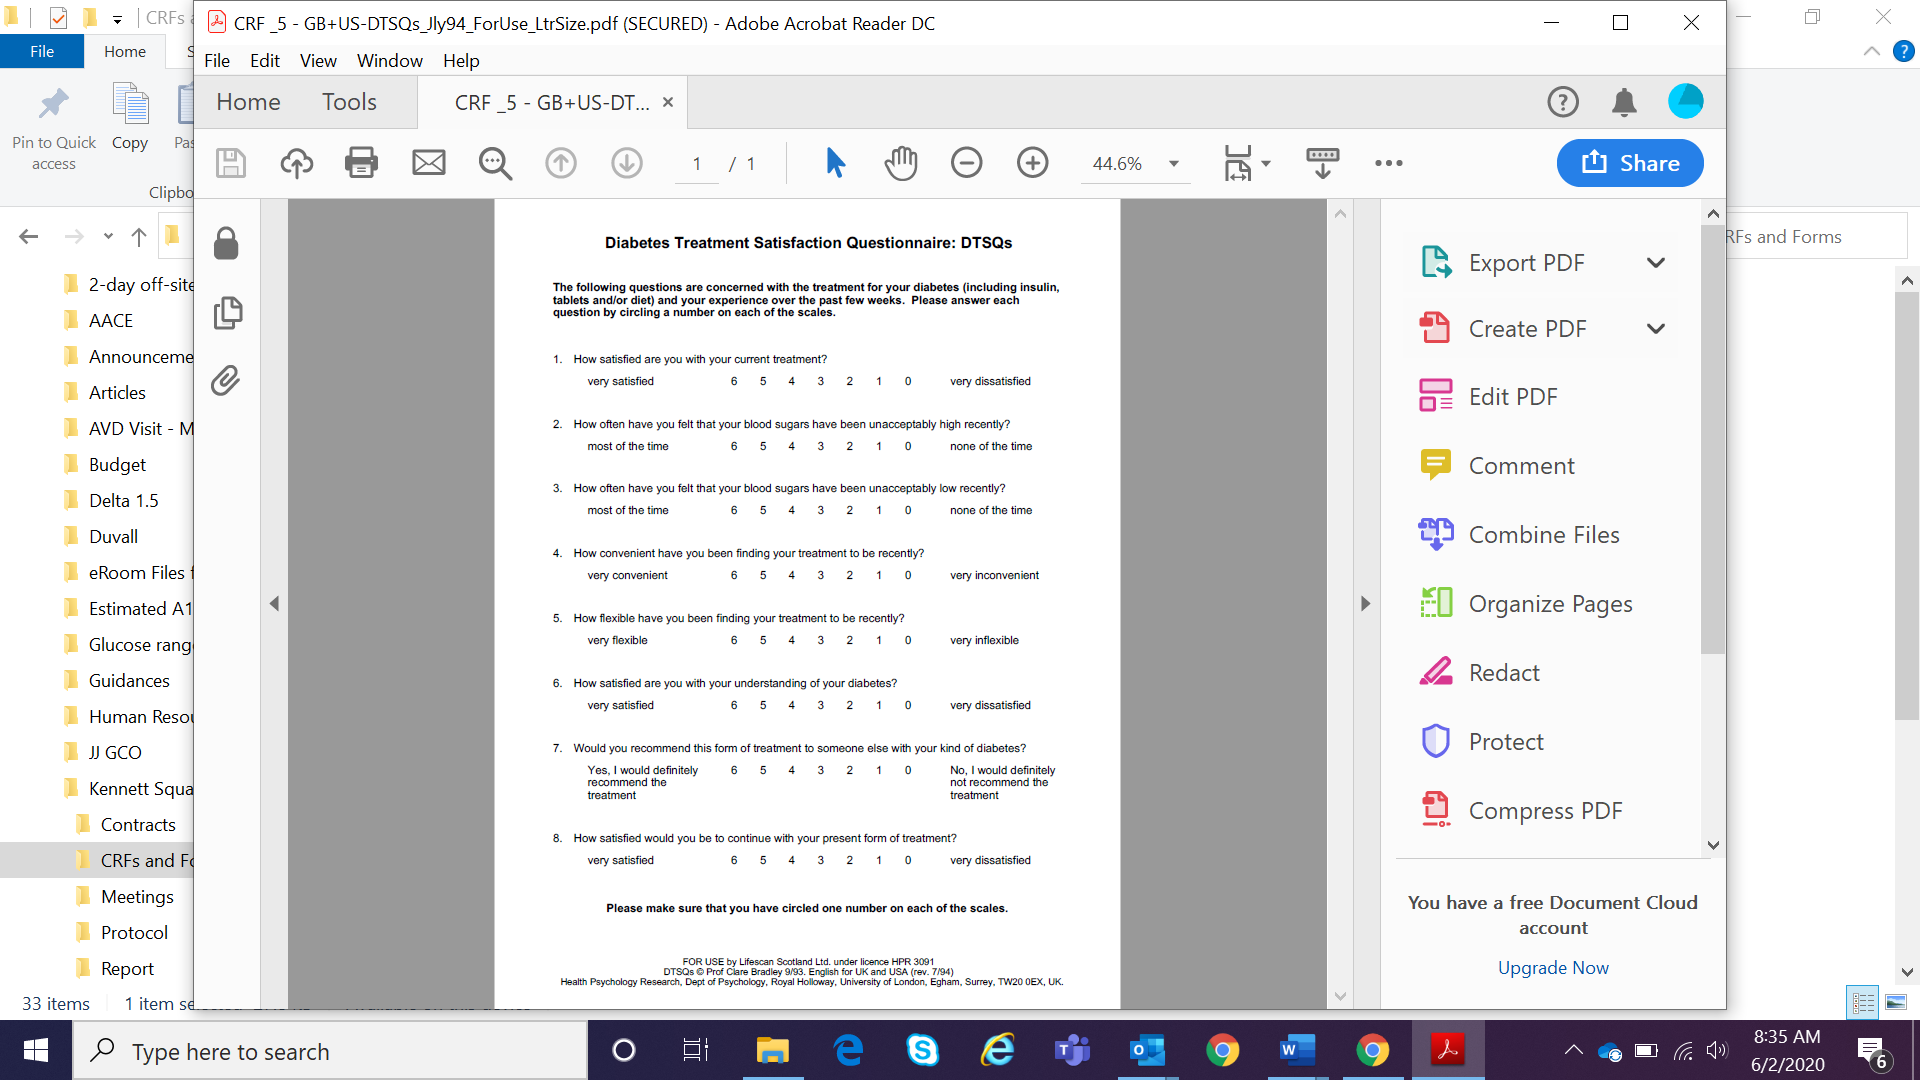


**Supplemental Figure S3. DTSQ (change) given to all subjects at week 12 and 24.**

*Note: A Spanish-language translation of this form was presented to all subjects*


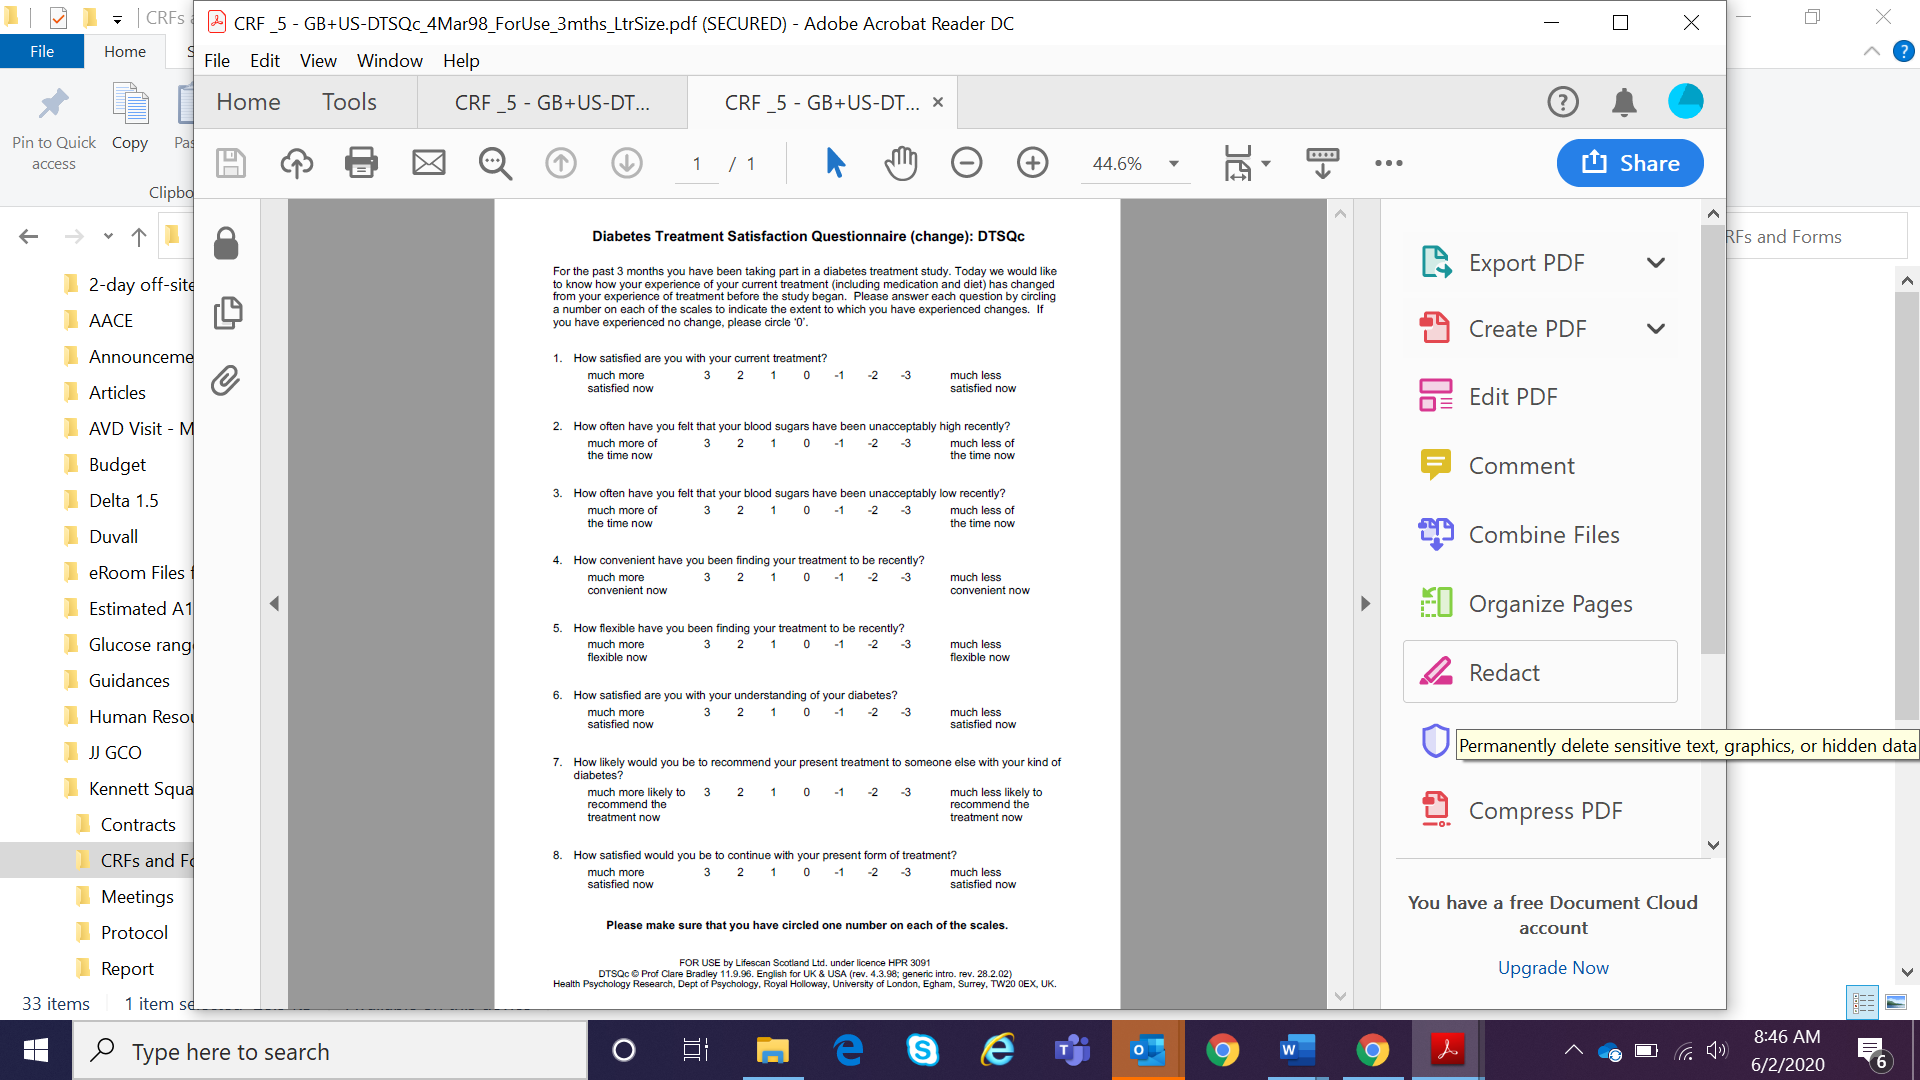


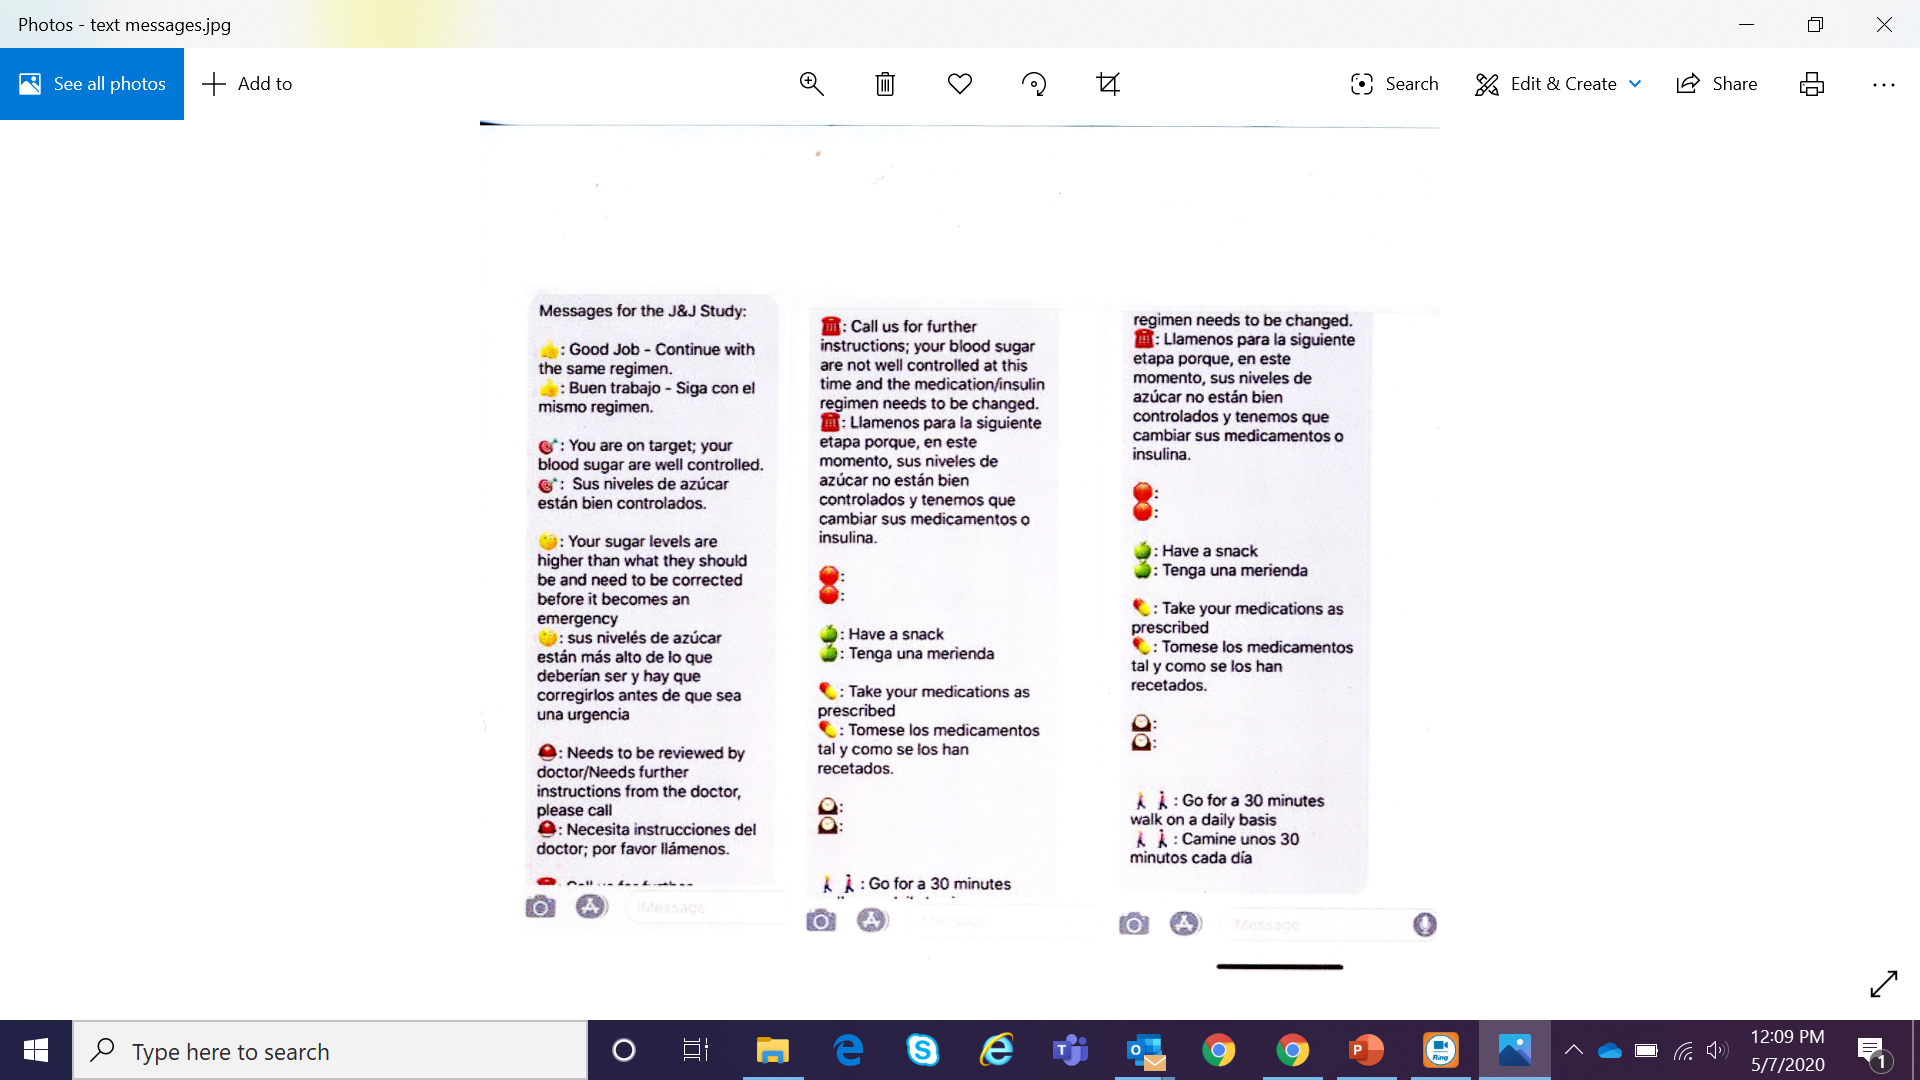


**Supplemental Figure S4.** Examples of text messages and emojis healthcare professionals sent to subjects’ cell phones.
